# Supplementary material for: Insight into the intrinsic activity of various transition metal sulfides for efficient hydrogen evolution reaction
Source: Royal Society of Chemistry journal article supplement (doi:10.1039/d3nr06456e), 2024-01-01
Supplement: d3nr06456e1.pdf [file d3nr06456e1.pdf]

## Supplementary Information

### Insight into the Intrinsic Activity of Transition Metal Sulfides for Hydrogen Evolution Reaction

Xinran Hu<sup>a,b</sup>, Yang Gao<sup>b,c,\*</sup>, Xinying Luo<sup>b,c</sup>, Junjie Xiong<sup>b,c</sup>, Ping Chen<sup>a,\*</sup>, Bin Wang<sup>b,c,\*</sup>

<sup>a</sup> *School of Chemistry and Chemical Engineering, Anhui University, Hefei, Anhui 230601, China*

<sup>b</sup> *CAS Key Laboratory of Nanosystem and Hierarchical Fabrication, National Center for Nanoscience and Technology, Beijing 100190, China*

<sup>c</sup> *University of Chinese Academy of Sciences, Beijing 100049, China*

\* Corresponding authors.

*E-mail addresses:* [gaoyang@nanoctr.cn](mailto:gaoyang@nanoctr.cn) (Y. Gao), [chenping@ahu.edu.cn](mailto:chenping@ahu.edu.cn) (P. Cheng),

[wangb@nanoctr.cn](mailto:wangb@nanoctr.cn) (B. Wang)

**Calculation of TOF.** The TOF is defined as follows:

$$TOF = \frac{JA}{2Fn} \quad (S1)$$

Where J is the current density ( $A\text{ cm}^{-2}$ ) at a certain overpotential, A is the surface area ( $\text{cm}^2$ ) of the electrode, 2 is the mole of electrons transferred to generate one mole of  $H_2$ , F is the Faraday constant ( $96485\text{ C mol}^{-1}$ ), and n is the number of moles of active sites. TOFs were calculated based on the assumption that all transition metal atoms in the samples are catalytically active.<sup>1,2</sup>

**Calculation of ECSA.** ECSA is calculated from the  $C_{dl}$  according to the equation:

$$ECSA = \frac{C_{dl}}{C_s} \quad (S2)$$

where  $C_s$  is the specific capacitance of the sample or the capacitance of an atomically smooth planar surface of the material per unit area under identical electrolyte conditions. While ideally, one would synthesize smooth, planar surfaces of each catalyst to measure  $C_s$  and estimate ECSA, this is not practical for most electrodeposited systems. However, specific capacitances have been measured for a variety of metal electrodes in acidic and alkaline solutions and typical values reported range between  $C_s = 0.015\text{-}0.110\text{ mF cm}^{-2}$  in  $H_2SO_4$  and  $C_s = 0.022\text{-}0.130\text{ mF cm}^{-2}$  in NaOH and KOH solutions.<sup>3,4</sup> For our estimates of surface area, we use general specific capacitances of  $C_s = 0.035\text{ mF cm}^{-2}$  in  $0.5\text{ M } H_2SO_4$  and  $C_s = 0.040\text{ mF cm}^{-2}$  in  $1\text{ M NaOH}$  based on typical reported values.<sup>5</sup>

**Calculation of  $j_0$ .** A small current density ( $j=5 \text{ mA cm}^{-2}$ ) is taken in the micro-polarization region, and the corresponding voltage is equal to the measured voltage ( $\eta$  V vs. RHE). The  $j_0$  is calculated according to the equation:

$$j = j_0 \frac{\eta F}{RT} \quad (\text{S3})$$

Where  $\eta$  is the overpotential (mV), F is the Faradaic constant, R is the ideal gas constant ( $8.314 \text{ J mol}^{-1}\text{K}^{-1}$ ), and T is the experimental temperature (298 K).<sup>6</sup>

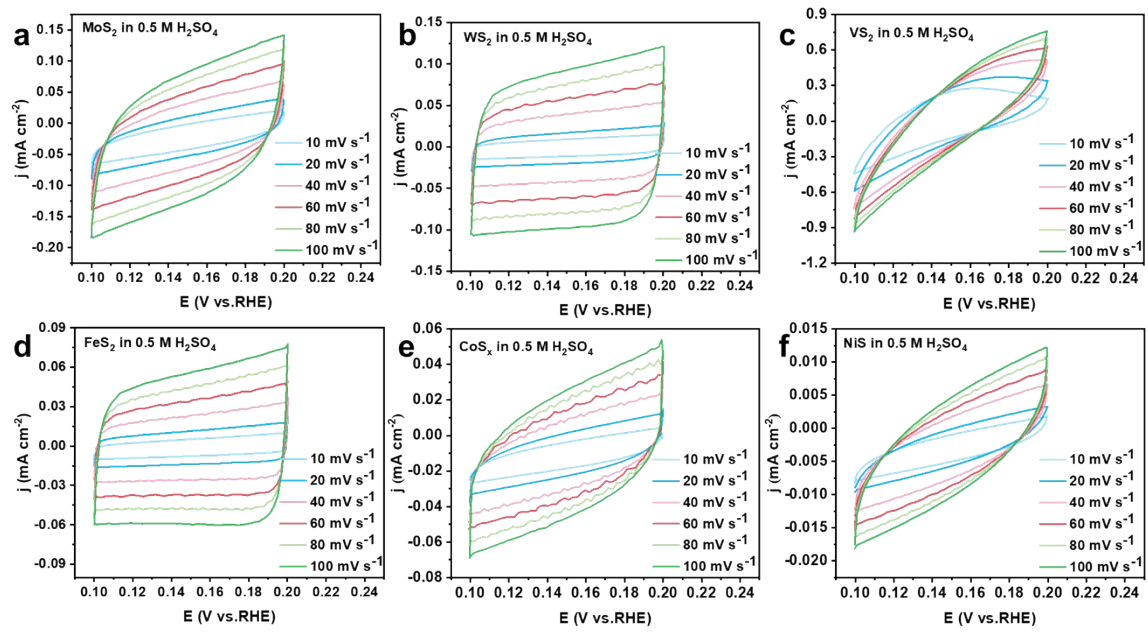

**Fig. S1** CV curves of (a)  $\text{MoS}_2$ , (b)  $\text{WS}_2$ , (c)  $\text{VS}_2$ , (d)  $\text{FeS}_2$ , (e)  $\text{CoS}_x$ , and (f)  $\text{NiS}$  at different scan rates of  $10, 20, 40, 60, 80,$  and  $100 \text{ mV s}^{-1}$  in  $0.5 \text{ M H}_2\text{SO}_4$ .

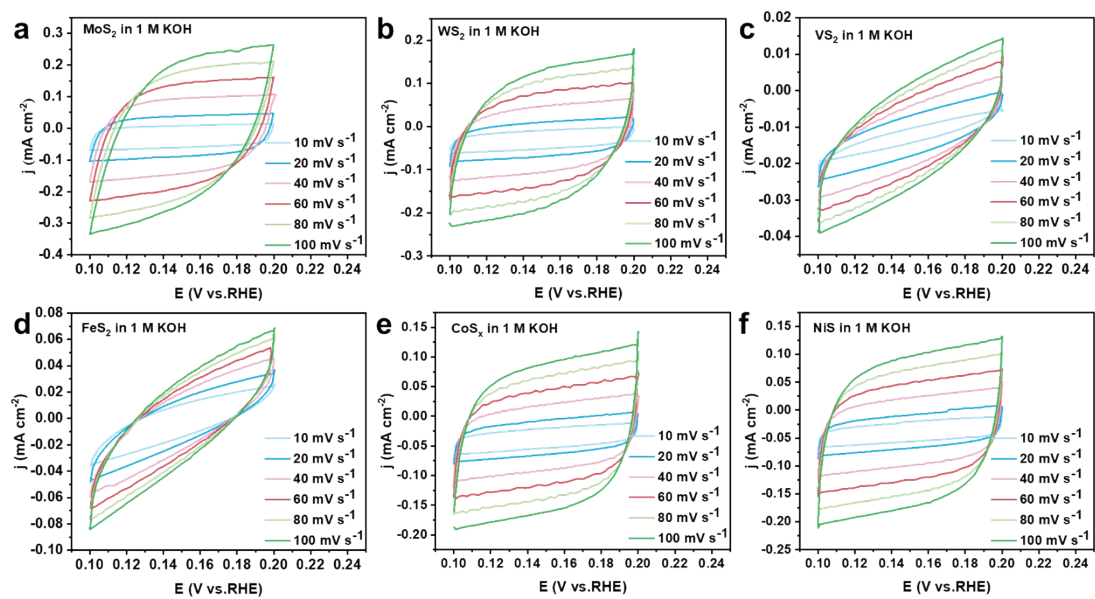

**Fig. S2** CV curves of (a) MoS<sub>2</sub>, (b) WS<sub>2</sub>, (c) VS<sub>2</sub>, (d) FeS<sub>2</sub>, (e) CoS<sub>x</sub>, and (f) NiS at different scan rates of 10, 20, 40, 60, 80, and 100 mV s<sup>-1</sup> in 1 M KOH.

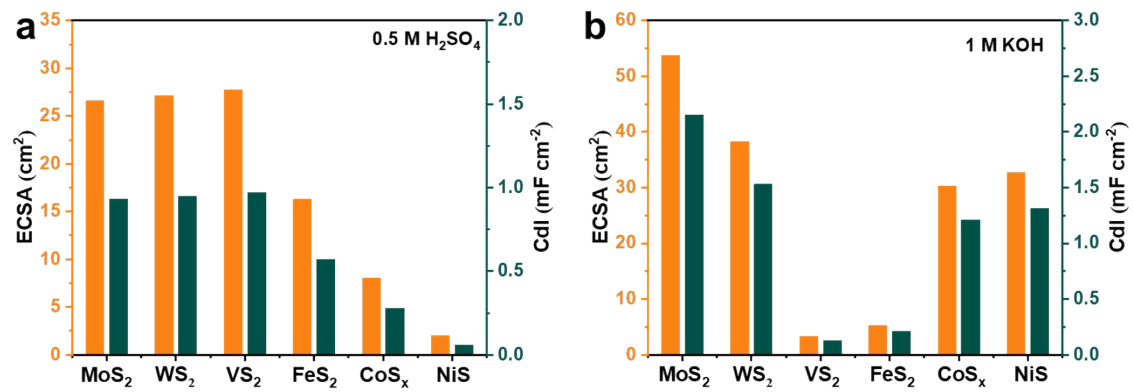

**Fig. S3** ECSA (left) and C<sub>dl</sub> (right) values of MoS<sub>2</sub>, WS<sub>2</sub>, VS<sub>2</sub>, FeS<sub>2</sub>, CoS<sub>x</sub>, and NiS in (a) 0.5 M H<sub>2</sub>SO<sub>4</sub> and (b) 1 M KOH.

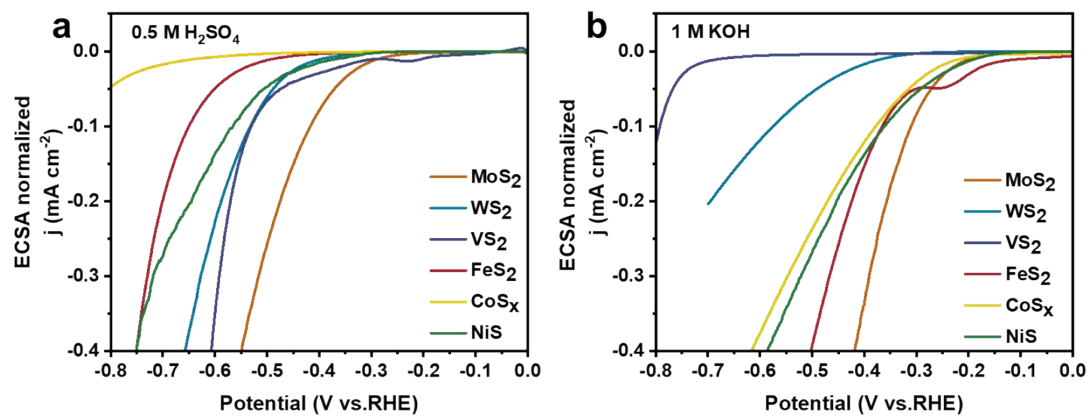

**Fig. S4** ECSA-normalized HER polarization curves of MoS<sub>2</sub>, WS<sub>2</sub>, VS<sub>2</sub>, FeS<sub>2</sub>, CoS<sub>x</sub> and NiS in (a) 0.5 M H<sub>2</sub>SO<sub>4</sub> and (b) 1 M KOH.

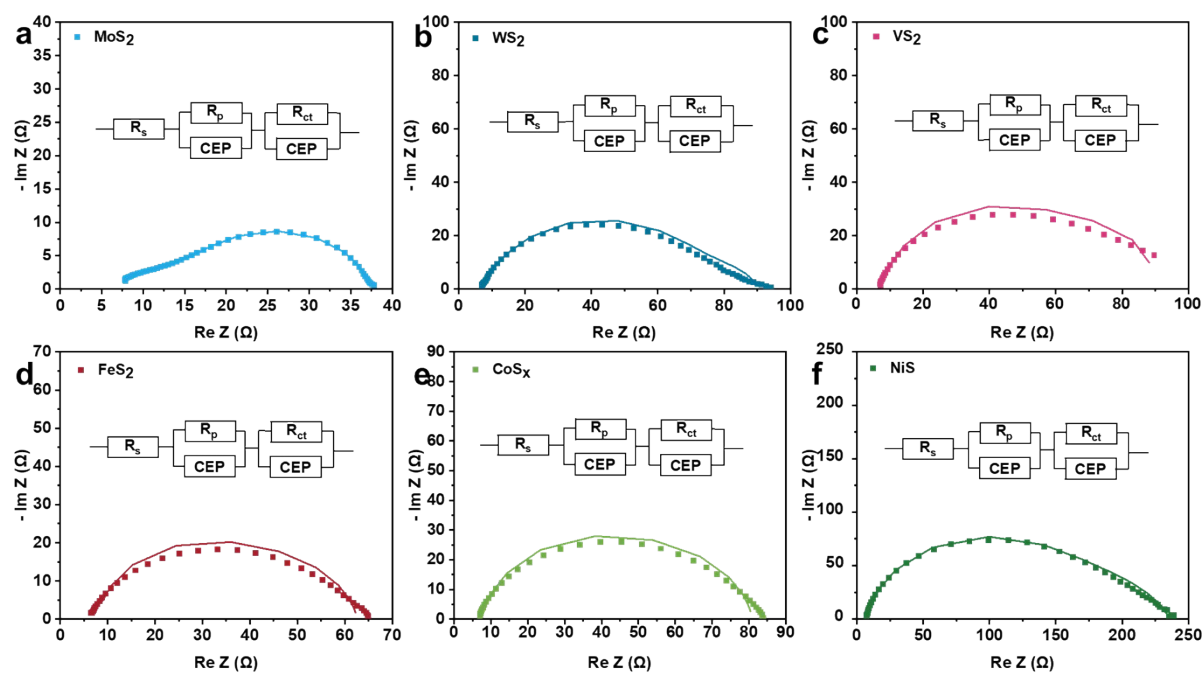

**Fig. S5** EIS curves of (a) MoS<sub>2</sub>, (b) WS<sub>2</sub>, (c) VS<sub>2</sub>, (d) FeS<sub>2</sub>, (e) CoS<sub>x</sub>, and (f) NiS in 0.5 M H<sub>2</sub>SO<sub>4</sub>.

**Table S1** The parameter of  $R_s$ ,  $R_p$ , and  $R_{ct}$  for MoS<sub>2</sub>, WS<sub>2</sub>, VS<sub>2</sub>, FeS<sub>2</sub>, CoS<sub>x</sub>, and NiS in 0.5 M H<sub>2</sub>SO<sub>4</sub>.

| Sample           | $R_s$ ( $\Omega$ ) | $R_p$ ( $\Omega$ ) | $R_{ct}$ ( $\Omega$ ) |
|------------------|--------------------|--------------------|-----------------------|
| MoS <sub>2</sub> | 6.63               | 9.90               | 21.24                 |
| WS <sub>2</sub>  | 6.98               | 67.46              | 16.21                 |
| VS <sub>2</sub>  | 7.48               | 66.76              | 15.34                 |
| FeS <sub>2</sub> | 7.81               | 32.00              | 22.85                 |
| CoS <sub>x</sub> | 7.76               | 43.91              | 29.24                 |
| NiS              | 6.76               | 153.80             | 75.21                 |



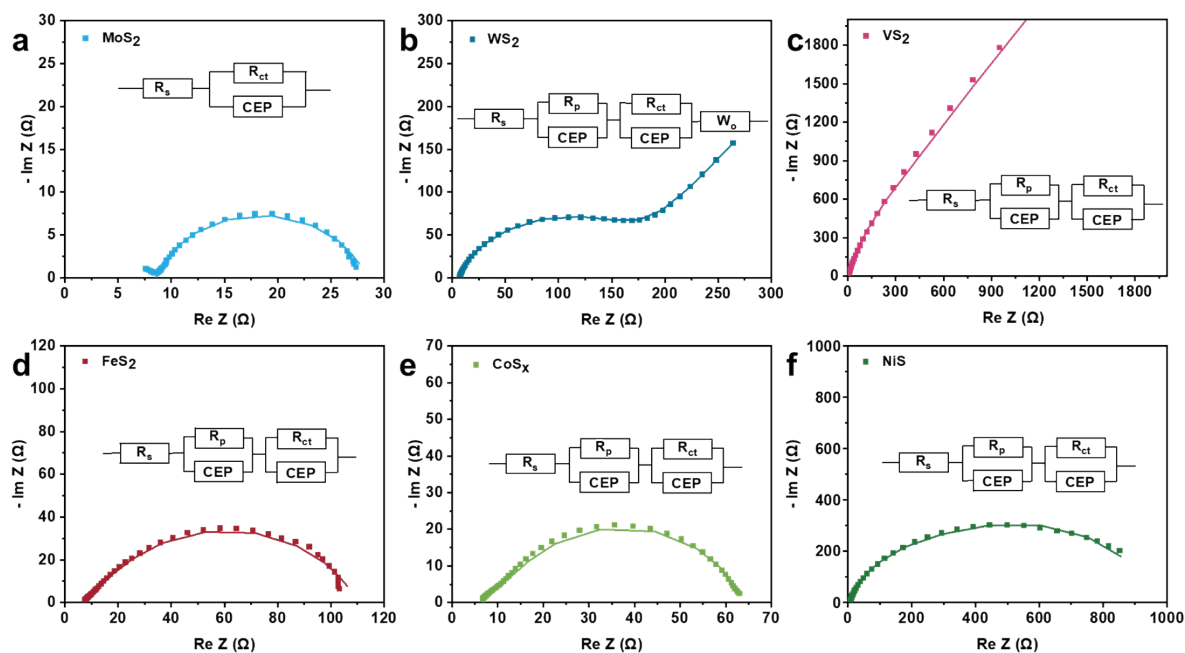

**Fig. S6** EIS curves of (a) MoS<sub>2</sub>, (b) WS<sub>2</sub>, (c) VS<sub>2</sub>, (d) FeS<sub>2</sub>, (e) CoS<sub>x</sub>, and (f) NiS in 1 M KOH.

**Table S2** The parameter of R<sub>s</sub>, R<sub>p</sub>, and R<sub>ct</sub> for MoS<sub>2</sub>, WS<sub>2</sub>, VS<sub>2</sub>, FeS<sub>2</sub>, CoS<sub>x</sub>, and NiS in 1 M KOH.

| Sample           | R <sub>s</sub> (Ω) | R <sub>p</sub> (Ω) | R <sub>ct</sub> (Ω) |
|------------------|--------------------|--------------------|---------------------|
| MoS <sub>2</sub> | 8.565              | /                  | 19.74               |
| WS <sub>2</sub>  | 6.899              | 23.59              | 126.30              |
| VS <sub>2</sub>  | 6.914              | 567.50             | 12302               |
| FeS <sub>2</sub> | 6.058              | 14.52              | 89.85               |
| CoS <sub>x</sub> | 4.421              | 18.99              | 42.11               |
| NiS              | 7.374              | 281.30             | 673.20              |

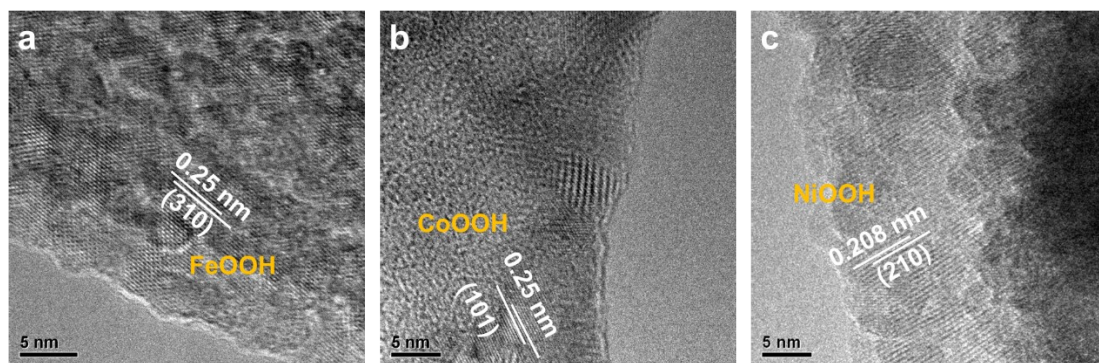

**Fig. S7** TEM characterization of (a) FeS<sub>2</sub>, (b) CoS<sub>x</sub> and (c) NiS after the reaction.

**Table S3** Performances of TMS-based electrocatalysts for HER.

| Catalyst                                         | Electrolyte                             | Overpotential<br>$\eta_{10}$ (mV) | Tafel slope<br>(mV dec <sup>-1</sup> ) | Ref.      |
|--------------------------------------------------|-----------------------------------------|-----------------------------------|----------------------------------------|-----------|
| MoS <sub>2</sub>                                 | 0.5 M H <sub>2</sub> SO <sub>4</sub>    | 390                               | 124                                    | This work |
| Strained vacancy MoS <sub>2</sub>                | 0.5 M H <sub>2</sub> SO <sub>4</sub>    | 170                               | 60                                     | 7         |
| 1T'-MoS <sub>2</sub>                             | 0.5 M H <sub>2</sub> SO <sub>4</sub>    | 175                               | 100                                    | 8         |
| MoS <sub>2</sub> /CNS                            | 0.5 M H <sub>2</sub> SO <sub>4</sub>    | 200                               | 53                                     | 9         |
| MoS <sub>2</sub> Particles                       | 0.5 M H <sub>2</sub> SO <sub>4</sub>    | 160                               | 82                                     | 10        |
| double-gyroid MoS <sub>2</sub>                   | 0.5 M H <sub>2</sub> SO <sub>4</sub>    | 200                               | 50                                     | 11        |
| 2H Planar MoS <sub>2</sub>                       | 0.5 M H <sub>2</sub> SO <sub>4</sub>    | 364                               | 108                                    | 12        |
| Vertically aligned MoS <sub>2</sub>              | 2H 0.5 M H <sub>2</sub> SO <sub>4</sub> | 400                               | 105                                    | 13        |
| MoS <sub>2</sub>                                 | 1 M KOH                                 | 256                               | 115                                    | This work |
| 2H MoS <sub>2</sub> bulk                         | 1 M KOH                                 | 600                               | 131                                    | 14        |
| 2H MoS <sub>2</sub> nanosheets                   | 1 M KOH                                 | 500                               | 108                                    | 14        |
| 2D-MoS <sub>2</sub> /Co(OH) <sub>2</sub>         | 1 M KOH                                 | 128                               | 76                                     | 15        |
| MoS <sub>2</sub>                                 | 1 M KOH                                 | 300 ( $\eta_5$ )                  | 144                                    | 16        |
| Co <sub>3</sub> O <sub>4</sub> /MoS <sub>2</sub> | 1 M KOH                                 | 205                               | 98                                     | 17        |
| H-MoS <sub>2</sub>                               | 1 M KOH                                 | 326                               | 134                                    | 18        |
| MoS <sub>2</sub> /NC                             | 1 M KOH                                 | 185                               | 90                                     | 19        |

$\eta_{10}$ : Overpotential at the current density of 10 mA cm<sup>-2</sup>

## References

- 1 K. Huang, J. Xia, Y. Lu, B. Zhang, W. Shi, X. Cao, X. Zhang, L.M. Woods, C. Han, C. Chen, T. Wang, J. Wu and Y. Huang, *Adv. Sci.*, 2023, **10**, 2300094.
- 2 J. Wang, X. Yue, Y. Yang, S. Sirisomboonchai, P. Wang, X. Ma, A. Abudula and G. Guan, *J. Alloy. Compd.*, 2020, **819**, 153346.
- 3 Y. Lu, H. Xu, J. Wang and X. Kong, *Electrochim. Acta.*, 2009, **54**, 3972-3978.
- 4 T.A. Centeno, and F. Stoeckli, *J. Power Sources.*, 2006, **154**, 314-320.
- 5 C.C. McCrory, S. Jung, J.C. Peters and T.F. Jaramillo, *J. Am. Chem. Soc.*, 2013, **135**, 16977-16987.
- 6 F. Song, W. Li, J. Yang, G. Han, P. Liao and Y. Sun, *Nat. Commun.*, 2018, **9**, 4531.
- 7 H. Li, C. Tsai, A. L. Koh, L. Cai, A. W. Contryman, A. H. Fragapane, J.K. Nørskov and X. Zheng, *Nat. Mater.*, 2016, **15**, 48-53.
- 8 Y. Yu, G.-H. Nam, Q. He, X.-J. Wu, K. Zhang, Z. Yang, J. Chen, Q. Ma, M. Zhao, Z. Liu, F. Ran, X. Wang, H. Li, X. Huang, B. Li, Q. Xiong, Q. Zhang, Z. Liu, L. Gu, Y. Du, W. Huang, and Zhang, H. *Nat. Chem.*, 2018, **10**, 638-643.
- 9 W. Hu, G. Han, Y. Liu, B. Dong, Y. Chai, Y. Liu and C. Liu, *Int. J. Hydrog. Energy.*, 2015, **40**, 6552.
- 10 T. Wang, D. Guo, J. Zhou, Z. Zhu, P. Papakonstantinou, Y. li and M. li, *Chem. Eur. J.* 2013, **19**, 11939-11948.
- 11 J. Kibsgaard, Z. Chen, B.N. Reinecke and T.F. Jaramillo, *Nat. Mater.* 2012, **11**, 963-969.
- 12 Y. Chen, A. Lu, P. Lu, X. Yang, C. Jiang, M. Mariano, B. Kaehr, O. Lin, A. Taylor,

- I.D. Sharp, L.J. Li, S.S. Chou and V. Tung, *Adv. Mater.*, 2017, **29**, 1703863.
- 13 D. Kong, H. Wang, J.J. Cha, M. Pasta, K.J. Koski, J. Yao and Y. Cui, *Nano Lett.*, 2013, **13**, 1341-1347.
- 14 S. Wang, D. Zhang, B. Li, C. Zhang, Z. Du, H. Yin, X. Bi and S. Yang, *Adv. Energy Mater.*, 2018, **8**, 1801345.
- 15 Z. Zhu, H. Yin, C.T. He, M. Al-Mamun, P. Liu, L. Jiang, Y. Zhao, Y. Wang, H.G. Yang, Z. Tang, D. Wang, X.M. Chen and H. Zhao, *Adv. Mater.*, 2018, **30**, 1801171.
- 16 S. Saleem, M. Salman, S. Alia, Y. Ling and M. Khan, *Int. J. Hydrog. Energy.*, 2022, **47**, 7713-7723.
- 17 A. Muthurasua, V. Maruthapandianc and H.Y. Kim, *Appl. Catal. B.*, 2019, **248**, 202–210.
- 18 Q. Liu, Z. Xue, B. Jia, Q. Liu, K. Liu, Y. Lin, M. Liu, Y. Li and G. Li, *Small*, 2020, **16**, 2002482.
- 19 X. Huang, H. Xu, D. Cao and D. Cheng, *Nano Energy.*, 2020, **78**, 105253.
